# Supplementary material for: Influences of viscosity on the osteogenic and adipogenic differentiation of mesenchymal stem cells with controlled morphology
Source: Royal Society of Chemistry journal article supplement (doi:10.1039/d2tb00729k), 2022-01-01
Supplement: d2tb00729k1.pdf [file d2tb00729k1.pdf]

## Supplementary Information

Influences of Viscosity on the Osteogenic and Adipogenic Differentiation of Mesenchymal Stem Cells with Controlled Morphology

Jing Zheng <sup>ab</sup>, Yongtao Wang <sup>ab</sup>, Naoki Kawazoe <sup>a</sup>, Yingnan Yang <sup>c</sup> and Guoping Chen <sup>\*ab</sup>

- a. Research Center for Functional Materials, National Institute for Materials Science, 1-1 Namiki, Tsukuba, Ibaraki 305-0044, Japan E-mail: Guoping.CHEN@nims.go.jp; Tel: 81-29-860-4496; Fax: 81-29-860-4673
- b. Department of Materials Science and Engineering, Graduate School of Pure and Applied Sciences, University of Tsukuba, 1-1-1 Tennodai, Tsukuba, Ibaraki 305-8577, Japan
- c. Graduate School of Life and Environmental Science, University of Tsukuba, 1-1-1 Tennodai, Tsukuba, Ibaraki 305-8572, Japan

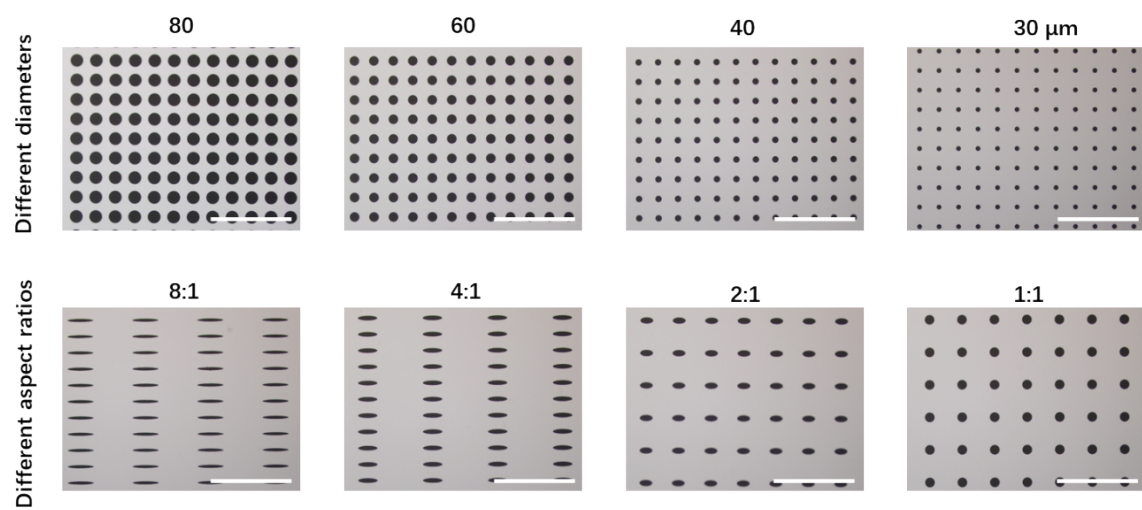

**Fig. S1** Phase-contrast photomicrographs of photomasks containing circular micropatterns of different diameters of 30, 40, 60 and 80  $\mu\text{m}$  and elliptic micropatterns of different aspect ratios of 1:1, 2:1, 4:1 and 8:1. Scale bar: 500  $\mu\text{m}$ .
